# Supplementary material
Source: PubMed Central journal article supplement (PMC4765328)

## Supporting Information

### QM/MM study of Thymidylate Synthase: Enzymatic motions and the temperature dependence of the rate limiting step

**Natalia Kanaan, Sergio Martí\*, Vicent Moliner\***

*Departament de Química Física i Analítica, Universitat Jaume I, 12071 Castellón, Spain.*

**Amnon Kohen**

*Department of Chemistry, University of Iowa, Iowa City, IA 52242, USA*

**Figure S1:** Interaction energies between substrate-protein and cofactor-protein, computed by residue at the reactants state and the transition state, at the four temperatures

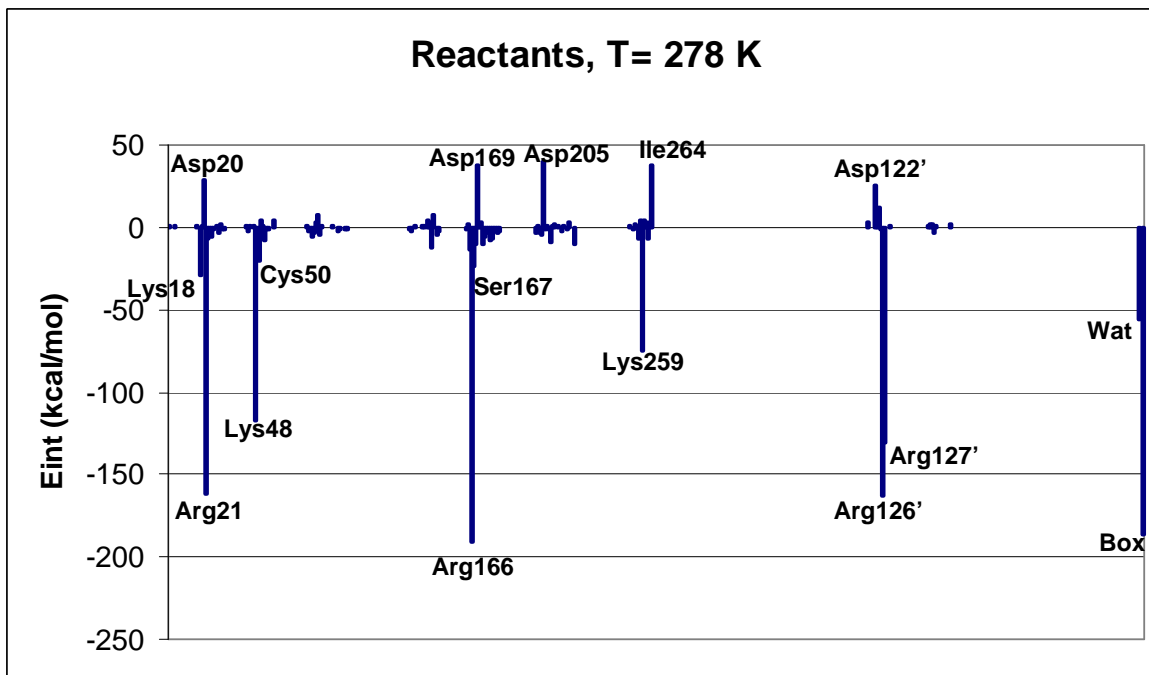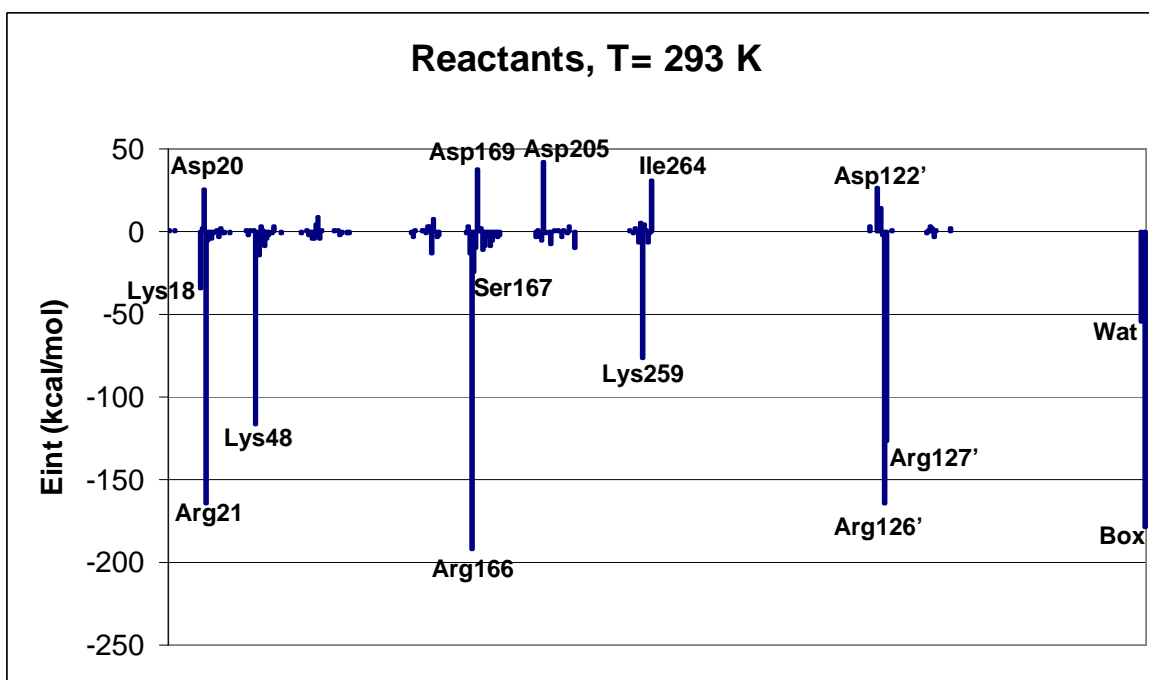

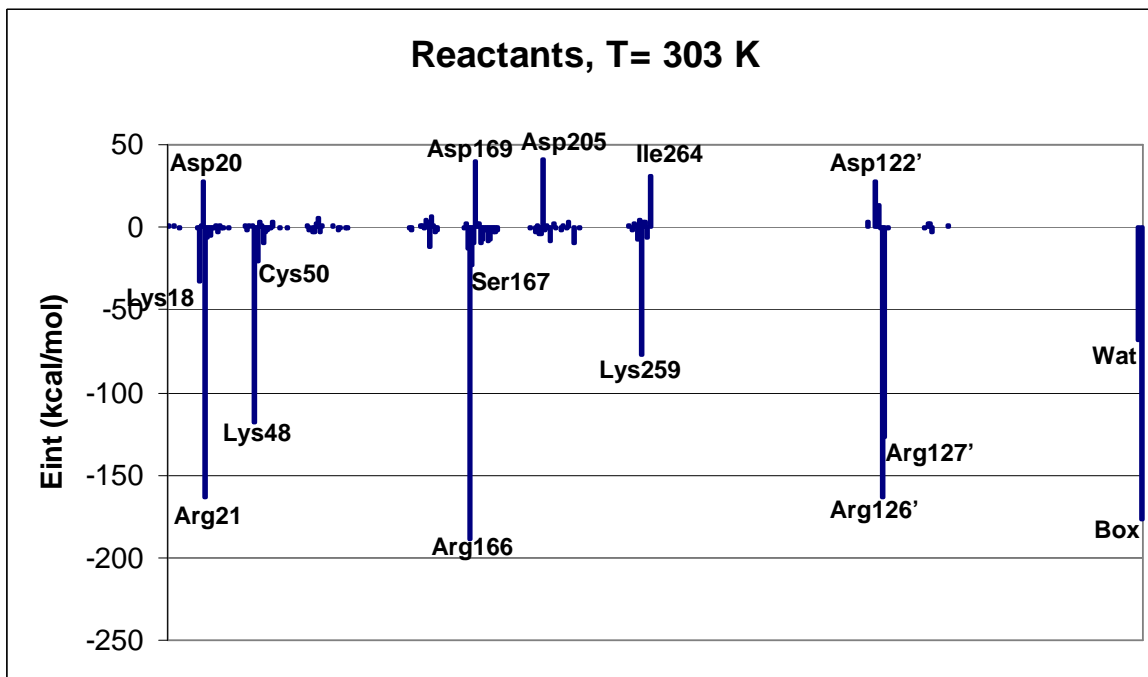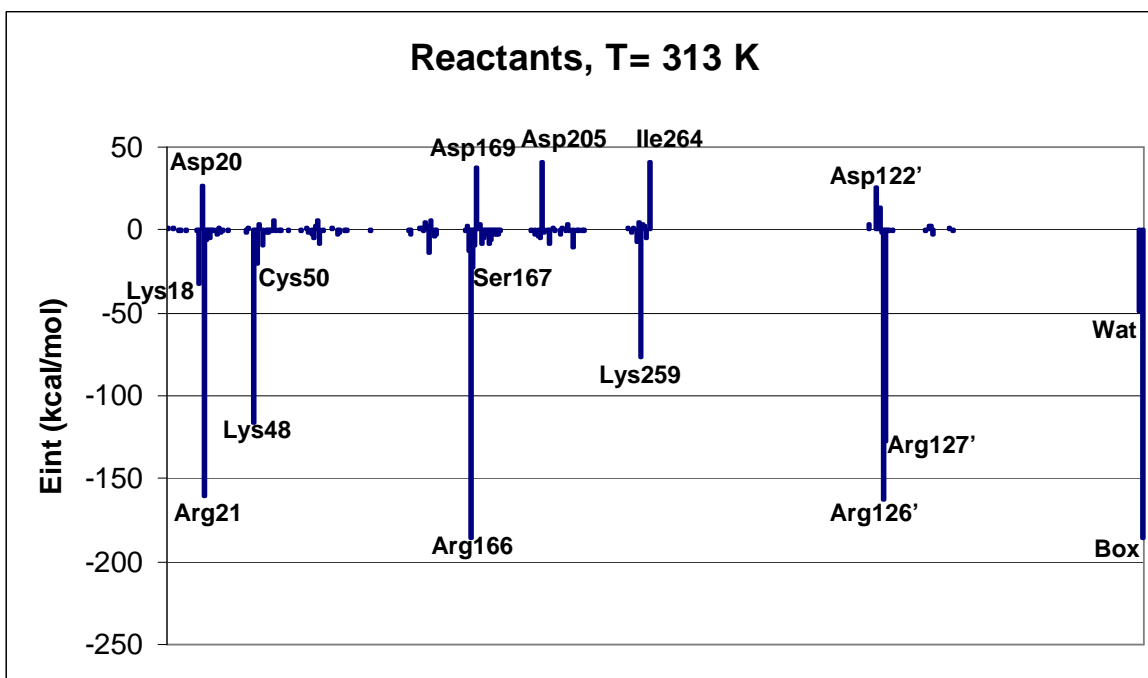

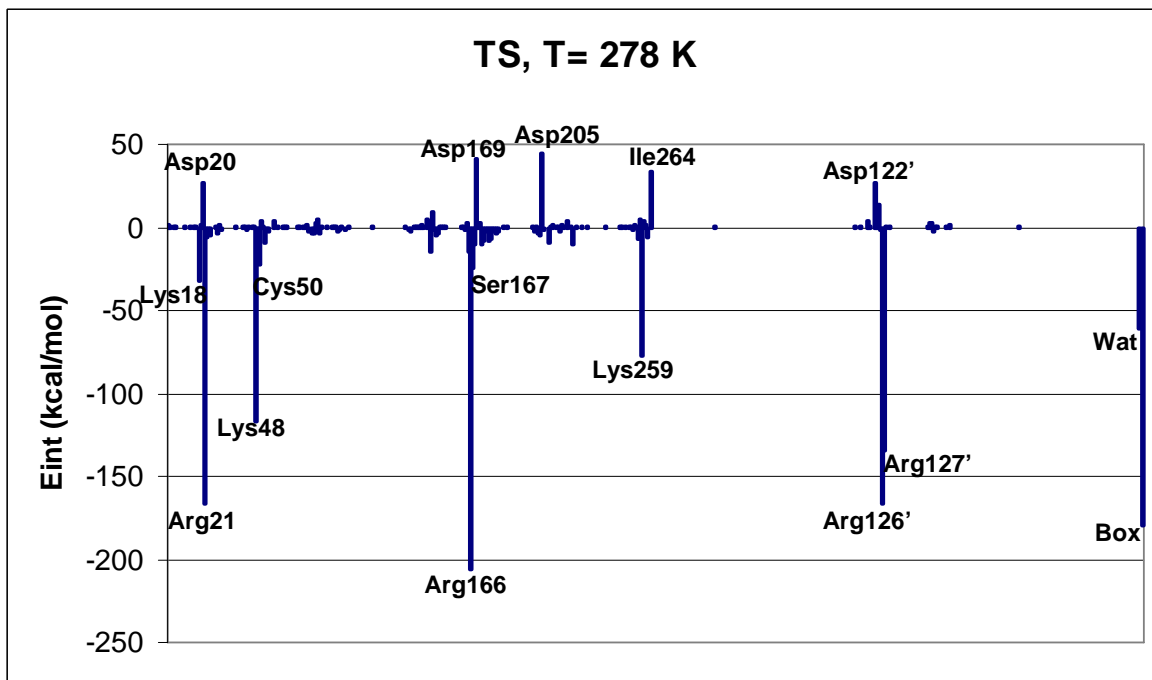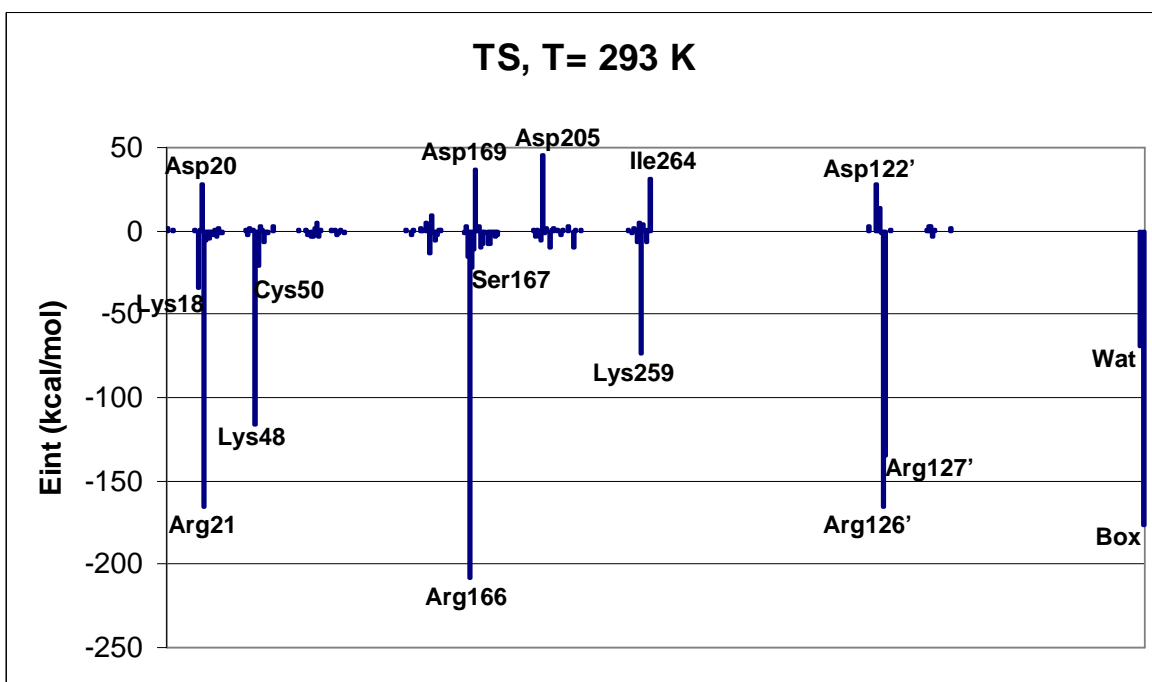

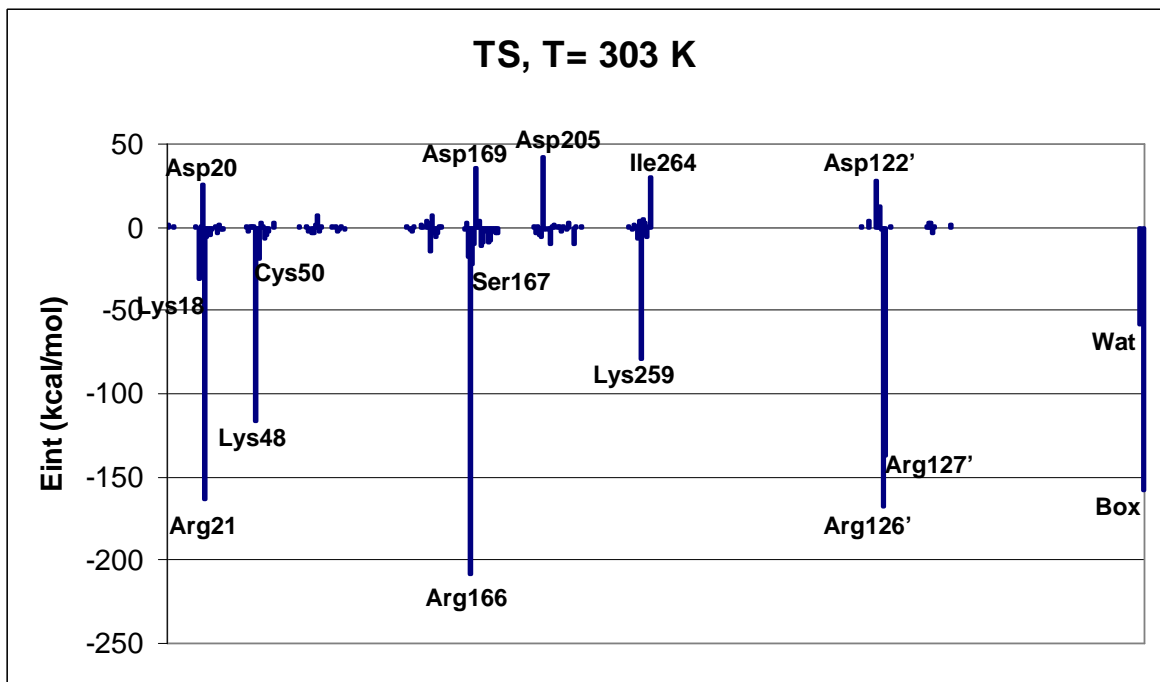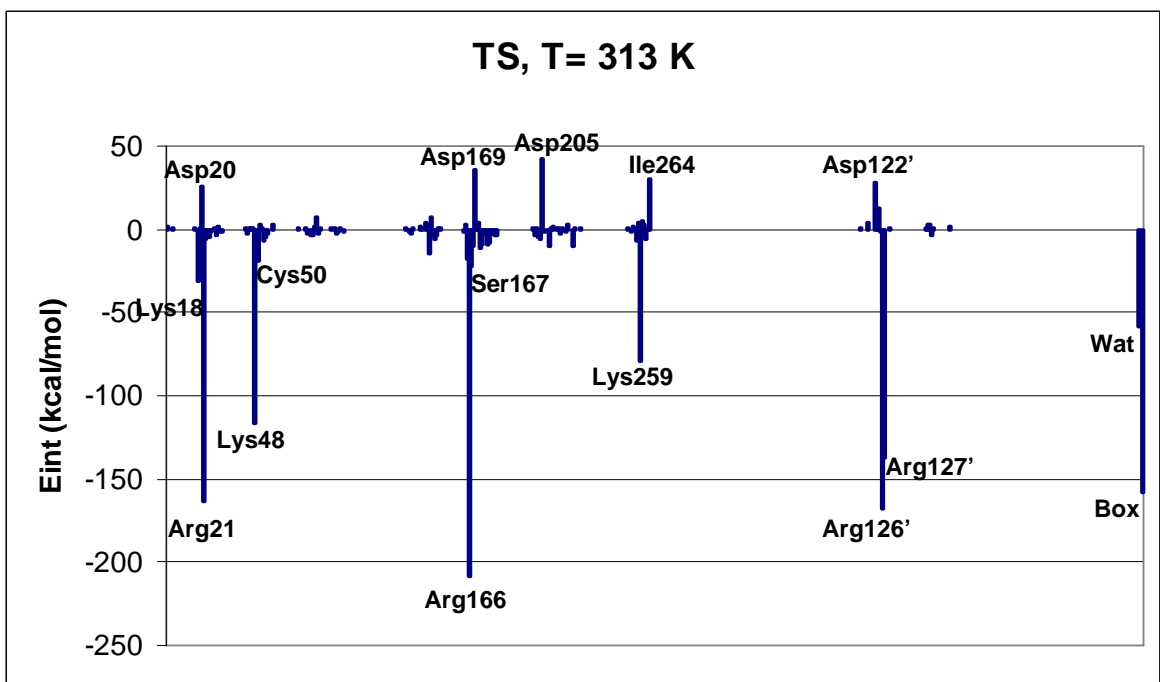

Supplement: NIHMS92495-supplement-1_si_001.pdf [file NIHMS92495-supplement-1_si_001.pdf]
